# Supplementary material for: Targeted genetic screening in mice through haploid embryonic stem cells identifies critical genes in bone development
Source: PubMed Central journal article supplement (PMC6629148; doi:10.1371/journal.pbio.3000350), 2019-07-02
Supplement: pbio.3000350.s011.pdf [file pbio.3000350.s011.pdf]

## S5 Table Analysis of cell clones randomly collected from Cas9B-3-BD.

| Clone NO.           | Gene-sgRNA        | sgRNA-Sequence        | Mutation Status |
|---------------------|-------------------|-----------------------|-----------------|
| 1                   | <i>Clec11a-1</i>  | TCAGCCCAATGGCGGCGTCC  | Wild-type       |
| 2                   | <i>Edil3-3</i>    | TCCACAACACTAGAGCAGTT  | Mutation        |
| 3                   | <i>Dapk2-2</i>    | CTCAAGGATGAGCACCACGT  | Mutation        |
| 4                   | <i>Dpt-2</i>      | ATCCATCATCACCGTAGTCC  | Mutation        |
| 5                   | <i>Fhl2-3</i>     | TGAATACTCGTCCAAGTGCC  | Mutation        |
| 6                   | <i>Glis2-1</i>    | AAGCGTCCGTCCACCTTCTC  | Wild-type       |
| 7                   | <i>Gulp1-3</i>    | AAGTTGTGAGAGATGCTGTC  | Wild-type       |
| 8                   | <i>Fmod-2</i>     | AGGGTCATAGGGGTCGTAGT  | Mutation        |
| 9                   | <i>Irx3-2</i>     | CCTCCTCGTCCGTGCGACTA  | Mutation        |
| 10                  | <i>Lum-1</i>      | GTGGACCGACGGACTCGGTC  | Mutation        |
| 11                  | <i>Maf-1</i>      | GCACTTCGACGACCGCTTCT  | Mutation        |
| 12                  | <i>Greb1-1</i>    | CAGCAGCTGTCATCGTTAGA  | Mutation        |
| 13                  | <i>Ms4a7-2</i>    | GGTACTTACCCCAGGTTTGT  | Mutation        |
| 14                  | <i>Sema7a-2</i>   | CAGCCCGGATGAGAACTCCC  | Mutation        |
| 15                  | <i>Omd-3</i>      | CCATTTAACATACCTTCGTG  | Mutation        |
| 16                  | <i>Plagl1-2</i>   | GCTCCCGAGAACGGGCTTGA  | Mutation        |
| 17                  | <i>Podn-2</i>     | CGGGGTAGATCTTCTCCAGC  | Wild-type       |
| 18                  | <i>Sepp1-1</i>    | GGCCGTCTTGTGTATCACCT  | Mutation        |
| 19                  | <i>Zbtb32-1</i>   | TCGGCCTCGAGGAAGAGTAG  | Mutation        |
| 20                  | <i>Srpx-3</i>     | GACTCACCACTAGAAGACGA  | Mutation        |
| 21                  | <i>Steap4-2</i>   | CTATCCGTTACTATGTTCTGA | Mutation        |
| 22                  | <i>Tbx15-3</i>    | GGTCCGCTCGGTGAGCACCT  | Mutation        |
| 23                  | <i>Tead2-3</i>    | GACGATGGCCACCATGTCTT  | Wild-type       |
| 24                  | <i>Tnfrsf19-1</i> | ACCAGCGCACAGTCCGCACA  | Mutation        |
| 25                  | <i>Gulp1-3</i>    | AAGTTGTGAGAGATGCTGTC  | Mutation        |
| 26                  | <i>Srpx-3</i>     | GACTCACCACTAGAAGACGA  | Wild-type       |
| 27                  | Blank             | GGGTCTTCGAGAAGAC      | -               |
| 28                  | <i>Fhl2-3</i>     | TGAATACTCGTCCAAGTGCC  | Mutation        |
| 29                  | <i>Dio2-3</i>     | ACCTACAAGAAGTCCGAAGT  | Mutation        |
| 30                  | <i>Aebp1-1</i>    | TAACCGATCCAGCGTTTCCA  | Mutation        |
| 31                  | <i>Tmtc1-3</i>    | CCATGTGCGCCGAGAGCTATG | Mutation        |
| 32                  | <i>Clec11a-3</i>  | CCACCAAGAACCGTCGTCTG  | Mutation        |
| 33                  | <i>Foxs1-3</i>    | CCTCGTGATGACCGCAAGCC  | Mutation        |
| 34                  | <i>Edil3-3</i>    | TCCACAACACTAGAGCAGTT  | Wild-type       |
| 35                  | <i>Trim35-2</i>   | TGGTGTAGGTGCAAACGACT  | Mutation        |
| Mutation Efficiency |                   |                       | 77.1% (27/35)   |

SgRNAs targeted by 1 time: 26

SgRNAs targeted by 2 times: 4

SgRNAs totally targeted: 30

Genes totally targeted: 29
