# Supplementary material for: Targeted genetic screening in mice through haploid embryonic stem cells identifies critical genes in bone development
Source: PubMed Central journal article supplement (PMC6629148; doi:10.1371/journal.pbio.3000350), 2019-07-02
Supplement: pbio.3000350.s014.pdf [file pbio.3000350.s014.pdf]

**S8 Table  $\mu$ -CT analysis of *Irx5* knockout mice.**

---

| Genotype                     | Gender | weight/g | Percent<br>bone volume | Trabecular<br>thickness | Trabecular<br>number | Cortical<br>thickness |
|------------------------------|--------|----------|------------------------|-------------------------|----------------------|-----------------------|
|                              |        |          | BV/TV                  | Tb.Th                   | Tb.N                 | C.Th                  |
| <i>Irx5</i> WT               | M      | 12.9     | 10.41                  | 0.06                    | 1.73                 | 0.13                  |
| <i>Irx5</i> WT               | M      | 13.6     | 12.72                  | 0.06                    | 2.02                 | 0.12                  |
| <i>Irx5</i> WT               | M      | 10.9     | 9.71                   | 0.06                    | 1.65                 | 0.13                  |
| <i>Irx5</i> WT               | M      | 15.2     | 7.30                   | 0.05                    | 1.35                 | 0.12                  |
| <i>Irx5</i> WT               | M      | 10.6     | 8.93                   | 0.06                    | 1.51                 | 0.11                  |
| <i>Irx5</i> WT               | M      | 10.9     | 6.36                   | 0.06                    | 1.13                 | 0.12                  |
| <i>Irx5</i> HM 1bp Insertion | M      | 6        | 1.03                   | 0.05                    | 0.21                 | 0.08                  |
| <i>Irx5</i> HM 1bp Insertion | M      | 5.5      | 0.54                   | 0.05                    | 0.12                 | 0.08                  |
| <i>Irx5</i> HM 1bp Insertion | M      | 6.5      | 1.30                   | 0.05                    | 0.26                 | 0.11                  |
| <i>Irx5</i> HM 7bp Deletion  | M      | 6.1      | 1.25                   | 0.06                    | 0.21                 | 0.11                  |
| <i>Irx5</i> HM 7bp Deletion  | M      | 5.1      | 1.09                   | 0.05                    | 0.23                 | 0.10                  |
| <i>Irx5</i> HM 7bp Deletion  | M      | 6.3      | 0.95                   | 0.05                    | 0.21                 | 0.08                  |

---
