# Supplementary material for: Targeted genetic screening in mice through haploid embryonic stem cells identifies critical genes in bone development
Source: PubMed Central journal article supplement (PMC6629148; doi:10.1371/journal.pbio.3000350), 2019-07-02
Supplement: pbio.3000350.s015.pdf [file pbio.3000350.s015.pdf]

### S9 Table Off-target analysis of the sgRNA targeting *Irx5*.

| Locus | Sequence                | Genomic Coordinates                  | % Indel (mutant/total) |
|-------|-------------------------|--------------------------------------|------------------------|
| OT-1  | CCCGGGTTCTCACCCTACGTTAG | GRCm38/mm10_chr13:41188069-41188091  | 0 (0/12)               |
| OT-2  | TCCGTGTCCTCTCCCTTCGCAGG | GRCm38/mm10_chr5:66802250-66802272   | 0 (0/12)               |
| OT-3  | TCCAAGTTCTTGCCCTACTCAAG | GRCm38/mm10_chr15:53947738-53947760  | 0 (0/12)               |
| OT-4  | CCTGCGTTCTCTCCCTACCCTGG | GRCm38/mm10_chr4:142133046-142133068 | 0 (0/12)               |
| OT-5  | GCTGCGTTCTCGCCCTGCTCCAG | GRCm38/mm10_chr17:56141816-56141838  | 0 (0/12)               |
| OT-6  | TCTGCGTTCGCGCCCTACAGCAG | GRCm38/mm10_chr10:80434082-80434104  | 0 (0/12)               |
| OT-7  | TCCGCCTTCTCCCCCTCCGTGGG | GRCm38/mm10_chr2:163645181-163645203 | 0 (0/12)               |
| OT-8  | TCCGTGTTCTGGCCCTCAGCGGG | GRCm38/mm10_chr3:116595403-116595425 | 0 (0/12)               |
| OT-9  | AGCGCCTTCTTGCCCTATGCCGC | GRCm38/mm10_chr13:71963238-71963260  | 0 (0/12)               |
| OT-10 | GGCGCCTTCCTGCCCTACGCCAC | GRCm38/mm10_chr8:91800990-91801012   | 0 (0/12)               |
| OT-11 | TCCCTTGCCCACTCTACGATTC  | GRCm38/mm10_chr13:73265423-73265445  | 0 (0/12)               |
| OT-12 | TCCTCCTGCTCACCCACCCTGC  | GRCm38/mm10_chr8:92679952-92679974   | 0 (0/12)               |

PAM: Marked in red

Mismatch: Marked in orange
