# Supplementary material for: Targeted genetic screening in mice through haploid embryonic stem cells identifies critical genes in bone development
Source: PLoS Biol. 2019 Jul 2;17(7):e3000350. doi: 10.1371/journal.pbio.3000350 (PMC6629148; doi:10.1371/journal.pbio.3000350)
Supplement: S6 Table — BD, bone development related; SC, semi-cloned. (PDF) [file pbio.3000350.s012.pdf]

**S6 Table Probability of a number of SC mice generated to cover a number of genes in BD Library using multinomial distribution analysis.**

| Probability          |    | NO. of Mice Needed |        |        |        |        |        |
|----------------------|----|--------------------|--------|--------|--------|--------|--------|
|                      |    | 200                | 300    | 400    | 500    | 600    | 700    |
| NO. of Genes Covered | 72 | 0.0%               | 1.0%   | 11.5%  | 33.3%  | 55.4%  | 71.7%  |
|                      | 71 | 0.0%               | 6.3%   | 38.4%  | 71.7%  | 89.2%  | 96.0%  |
|                      | 70 | 0.2%               | 19.3%  | 67.2%  | 91.8%  | 98.3%  | 99.7%  |
|                      | 69 | 0.7%               | 39.5%  | 86.9%  | 98.3%  | 99.8%  | 100.0% |
|                      | 68 | 2.5%               | 61.6%  | 95.9%  | 99.7%  | 99.8%  | 100.0% |
|                      | 67 | 7.2%               | 79.2%  | 98.9%  | 100.0% | 100.0% | 100.0% |
|                      | 66 | 15.3%              | 90.6%  | 99.8%  | 100.0% | 100.0% | 100.0% |
|                      | 65 | 28.0%              | 96.4%  | 100.0% | 100.0% | 100.0% | 100.0% |
|                      | 64 | 44.0%              | 98.9%  | 100.0% | 100.0% | 100.0% | 100.0% |
|                      | 63 | 60.3%              | 99.7%  | 100.0% | 100.0% | 100.0% | 100.0% |
|                      | 62 | 74.5%              | 99.9%  | 100.0% | 100.0% | 100.0% | 100.0% |
|                      | 61 | 85.6%              | 100.0% | 100.0% | 100.0% | 100.0% | 100.0% |
|                      | 60 | 92.7%              | 100.0% | 100.0% | 100.0% | 100.0% | 100.0% |
|                      | 59 | 96.7%              | 100.0% | 100.0% | 100.0% | 100.0% | 100.0% |
|                      | 58 | 98.7%              | 100.0% | 100.0% | 100.0% | 100.0% | 100.0% |
|                      | 57 | 99.6%              | 100.0% | 100.0% | 100.0% | 100.0% | 100.0% |
|                      | 56 | 99.9%              | 100.0% | 100.0% | 100.0% | 100.0% | 100.0% |
|                      | 55 | 100.0%             | 100.0% | 100.0% | 100.0% | 100.0% | 100.0% |
|                      | 54 | 100.0%             | 100.0% | 100.0% | 100.0% | 100.0% | 100.0% |
|                      | 53 | 100.0%             | 100.0% | 100.0% | 100.0% | 100.0% | 100.0% |
